# Supplementary material
Source: HighWire-hosted journal article supplement (https://erj.ersjournals.com/content/54/4/1900982)
Supplement: inline-supplementary-material-2 [file inline-supplementary-material-2.pdf]

**Supplementary File 2: List of hospitals contributing data**

The authors wish to endorse the following London, UK hospitals as data contributors for this study:

- Central Middlesex Hospital
- Charing Cross Hospital
- Chelsea and Westminster Hospital
- Croydon University Hospital
- Ealing Hospital
- Edgware Hospital
- Hammersmith Hospital
- Hillingdon Hospital
- Homerton Hospital
- King George's Hospital
- King's College Hospital
- Kingston Hospital
- London Chest Hospital (now closed)
- Mile End Hospital
- Newham General Hospital
- North Middlesex University Hospital
- Northwick Park Hospital
- Princess Royal University Hospital
- Queen Elizabeth Hospital
- Queen's Hospital (Romford)
- Royal Free Hospital
- St. George's Hospital (Tooting)
- St. Helier Hospital
- St. Mary's Hospital
- St. Thomas' Hospital
- University College Hospital
- University Hospital Lewisham
- West Middlesex University Hospital
- Whipps Cross University Hospital
- Whittington Hospital
