# Supplementary material
Source: HighWire-hosted journal article supplement (https://erj.ersjournals.com/content/54/4/1900982)
Supplement: inline-supplementary-material-3 [file inline-supplementary-material-3.pdf]

### Supplementary File 3: Additional drug resistance in the study population

DST results at baseline. Missingness documents that a sample was not tested against a particular drug. Col.- column, DST- drug sensitivity testing, No.- number

| Exposure variables |           | England |        | London |        |
|--------------------|-----------|---------|--------|--------|--------|
|                    |           | No.     | Col. % | No.    | Col. % |
| Overall            |           | 1,228   | 100    | 626    | 100    |
| Ethambutol         | Sensitive | 1,201   | 97.8   | 611    | 97.6   |
|                    | Resistant | 23      | 1.9    | 15     | 2.4    |
|                    | Missing   | 4       | 0.3    | 0      | 0.0    |
| Pyrazinamide       | Sensitive | 1,210   | 98.5   | 616    | 98.4   |
|                    | Resistant | 13      | 1.1    | 9      | 1.4    |
|                    | Missing   | 5       | 0.4    | 1      | 0.2    |
| Streptomycin       | Sensitive | 638     | 52.0   | 422    | 67.4   |
|                    | Resistant | 294     | 23.9   | 139    | 22.2   |
|                    | Missing   | 296     | 24.1   | 65     | 10.4   |
| Amikacin           | Sensitive | 111     | 9.0    | 55     | 8.8    |
|                    | Resistant | 0       | 0.0    | 0      | 0.0    |
|                    | Missing   | 1,117   | 91.0   | 571    | 91.2   |
| Kanamycin          | Sensitive | 89      | 7.2    | 37     | 5.9    |
|                    | Resistant | 0       | 0.0    | 0      | 0.0    |
|                    | Missing   | 1,139   | 92.8   | 589    | 94.1   |
| Capreomycin        | Sensitive | 108     | 8.8    | 54     | 8.6    |
|                    | Resistant | 2       | 0.2    | 1      | 0.2    |
|                    | Missing   | 1,118   | 91.0   | 571    | 91.2   |
| Ciprofloxacin      | Sensitive | 339     | 27.6   | 19     | 3.0    |
|                    | Resistant | 4       | 0.3    | 0      | 0.0    |
|                    | Missing   | 885     | 72.1   | 607    | 97.0   |
| Ofloxacin          | Sensitive | 101     | 8.2    | 47     | 7.5    |
|                    | Resistant | 0       | 0.0    | 0      | 0.0    |
|                    | Missing   | 1,127   | 91.8   | 579    | 92.5   |
| Moxifloxacin       | Sensitive | 102     | 8.3    | 48     | 7.7    |
|                    | Resistant | 0       | 0.0    | 0      | 0.0    |
|                    | Missing   | 1,126   | 91.7   | 578    | 92.3   |
| Azithromycin       | Sensitive | 151     | 12.3   | 0      | 0.0    |
|                    | Resistant | 1       | 0.1    | 0      | 0.0    |
|                    | Missing   | 1,076   | 87.6   | 626    | 100.0  |
| Clarithromycin     | Sensitive | 332     | 27.0   | 10     | 1.6    |
|                    | Resistant | 13      | 1.1    | 11     | 1.8    |
|                    | Missing   | 883     | 71.9   | 605    | 96.6   |
| Ethionamide        | Sensitive | 68      | 5.5    | 32     | 5.1    |
|                    | Resistant | 39      | 3.2    | 22     | 3.5    |
|                    | Missing   | 1,121   | 91.3   | 572    | 91.4   |
| Prothionamide      | Sensitive | 56      | 4.6    | 19     | 3.0    |
|                    | Resistant | 34      | 2.8    | 18     | 2.9    |
|                    | Missing   | 1,138   | 92.7   | 589    | 94.1   |

### Supplementary File 3: continued

| Exposure variables       |           | England |        | London |        |
|--------------------------|-----------|---------|--------|--------|--------|
|                          |           | No.     | Col. % | No.    | Col. % |
| Cycloserine              | Sensitive | 18      | 1.5    | 17     | 2.7    |
|                          | Resistant | 1       | 0.1    | 1      | 0.2    |
|                          | Missing   | 1,209   | 98.5   | 608    | 97.1   |
| Para-aminosalicylic acid | Sensitive | 9       | 0.7    | 4      | 0.6    |
|                          | Resistant | 2       | 0.2    | 1      | 0.2    |
|                          | Missing   | 1,217   | 99.1   | 621    | 99.2   |
| Linezolid                | Sensitive | 69      | 5.6    | 31     | 5.0    |
|                          | Resistant | 0       | 0.0    | 0      | 0.0    |
|                          | Missing   | 1,159   | 94.4   | 595    | 95.0   |
| Rifabutin                | Sensitive | 171     | 13.9   | 18     | 2.9    |
|                          | Resistant | 0       | 0.0    | 0      | 0.0    |
|                          | Missing   | 1,057   | 86.1   | 608    | 97.1   |
