# Supplementary material
Source: HighWire-hosted journal article supplement (https://erj.ersjournals.com/content/54/4/1900982)
Supplement: inline-supplementary-material-5 [file inline-supplementary-material-5.pdf]

# Supplementary File 5: Univariable logistic regression of baseline characteristics as a predictor of negative outcomes

Univariable logistic regression of demographic and clinical baseline characteristics as predictors of negative regimen-specific outcomes in patients without additional drug resistance, unless to streptomycin. Each model contains the patients without missing data. CI- confidence interval, CNS- central nervous system, No.- number, OR- odds ratio, p- p-value, TB- tuberculosis, ±- with or without, -ve- negative, +ve- positive

| Exposure variables    |                                       | Negative outcome |       |                      |
|-----------------------|---------------------------------------|------------------|-------|----------------------|
|                       |                                       | No.              | Row % | OR [95% CI], p-value |
| Overall               |                                       | 84               | 100.0 | -                    |
| Year                  |                                       |                  |       |                      |
|                       | 2009                                  | 16               | 11.7  | p=0.91               |
|                       | 2010                                  | 14               | 11.9  | 0.84 [0.38-1.89]     |
|                       | 2011                                  | 19               | 13.5  | 0.99 [0.47-2.09]     |
|                       | 2012                                  | 20               | 16.0  | 1.22 [0.58-2.58]     |
|                       | 2013                                  | 15               | 14.3  | 1.12 [0.51-2.47]     |
|                       | Missing                               | 0                | -     | -                    |
| Sex                   |                                       |                  |       |                      |
|                       | Male                                  | 45               | 11.8  | p=0.12               |
|                       | Female                                | 39               | 15.9  | 1.47 [0.90-2.40]     |
|                       | Missing                               | 0                | -     | -                    |
| Age (years)           |                                       |                  |       |                      |
|                       | 18-37                                 | 43               | 12.0  | p=0.23               |
|                       | 38-57                                 | 32               | 16.1  | 1.58 [0.93-2.68]     |
|                       | 58+                                   | 9                | 14.5  | 1.40 [0.62-3.19]     |
|                       | Missing                               | 0                | -     | -                    |
| UK born               |                                       |                  |       |                      |
|                       | No                                    | 63               | 12.7  | p=0.16               |
|                       | Yes                                   | 20               | 16.5  | 1.57 [0.85-2.91]     |
|                       | Missing                               | 1                | 12.5  | -                    |
| Ethnic group          |                                       |                  |       |                      |
|                       | White                                 | 15               | 15.5  | p=0.40               |
|                       | Black African                         | 13               | 10.4  | 0.55 [0.23-1.29]     |
|                       | Black Other                           | 7                | 15.6  | 0.87 [0.31-2.45]     |
|                       | Indian subcontinent                   | 33               | 12.2  | 0.63 [0.29-1.34]     |
|                       | Other                                 | 16               | 18.8  | 1.08 [0.47-2.49]     |
|                       | Missing                               | 0                | 0.0   | -                    |
| Social risk factors   |                                       |                  |       |                      |
|                       | No or unknown                         | 69               | 13.5  | p=0.91               |
|                       | One or more ever                      | 6                | 16.2  | 1.15 [0.43-3.08]     |
|                       | One or more current                   | 9                | 11.4  | 0.89 [0.40-1.98]     |
| Previous TB diagnosis |                                       |                  |       |                      |
|                       | No                                    | 77               | 13.4  | p=0.10               |
|                       | Yes                                   | 5                | 25.0  | 2.82 [0.89-8.94]     |
|                       | Missing                               | 2                | 6.5   | -                    |
| Inpatient             |                                       |                  |       |                      |
|                       | No                                    | 55               | 13.0  | p=0.38               |
|                       | Yes                                   | 28               | 14.7  | 1.26 [0.75-2.13]     |
|                       | Missing                               | 1                | 7.1   | -                    |
| Site of disease       |                                       |                  |       |                      |
|                       | Pulmonary ± extrapulmonary, smear +ve | 30               | 15.5  | 1.47 [0.76-2.83]     |
|                       | Pulmonary ± extrapulmonary, smear -ve | 19               | 11.9  | p=0.45               |
|                       | Meningeal TB or other CNS involvement | 5                | 20.8  | 2.19 [0.66-7.23]     |
|                       | Other extrapulmonary                  | 30               | 12.0  | 1.10 [0.58-2.10]     |
|                       | Missing                               | 0                | -     | -                    |
| Part of outbreak      |                                       |                  |       |                      |
|                       | No                                    | 70               | 14.0  | p=0.85               |
|                       | Yes                                   | 9                | 13.8  | 0.92 [0.41-2.10]     |
|                       | Missing                               | 5                | 8.3   | -                    |
