# Supplementary material
Source: HighWire-hosted journal article supplement (https://erj.ersjournals.com/content/54/4/1900982)
Supplement: inline-supplementary-material-6 [file inline-supplementary-material-6.pdf]

**Supplementary File 6: Isoniazid resistance mutations**

Isoniazid resistance mutations among the 161 strains that underwent successful genotyping and their associated degree of phenotypic resistance to isoniazid. No.- number.

| Genotype               | Total | Phenotype        |       |           |       |            |       |
|------------------------|-------|------------------|-------|-----------|-------|------------|-------|
|                        |       | Highly resistant |       | Resistant |       | Borderline |       |
|                        |       | No.              | Row % | No.       | Row % | No.        | Row % |
| ahpC_C-72T             | 1     | 1                | 100.0 | 0         | 0.0   | 0          | 0.0   |
| fabG1_C-15T            | 79    | 63               | 79.7  | 10        | 12.7  | 6          | 7.6   |
| inhA_I194T/fabG1_C-15T | 1     | 1                | 100.0 | 0         | 0.0   | 0          | 0.0   |
| inhA_I21T/fabG1_C-15T  | 1     | 1                | 100.0 | 0         | 0.0   | 0          | 0.0   |
| inhA_S94A/fabG1_C-15T  | 1     | 1                | 100.0 | 0         | 0.0   | 0          | 0.0   |
| katG_S315T/N           | 72    | 72               | 100.0 | 0         | 0.0   | 0          | 0.0   |
| katG_S315T/fabG1_C-15T | 5     | 5                | 100.0 | 0         | 0.0   | 0          | 0.0   |
| katG_S315T/fabG1_G-17T | 1     | 1                | 100.0 | 0         | 0.0   | 0          | 0.0   |
| Total                  | 161   | 145              | 90.1  | 10        | 6.2   | 6          | 3.7   |
