# Supplementary material
Source: HighWire-hosted journal article supplement (https://erj.ersjournals.com/content/54/4/1900982)
Supplement: inline-supplementary-material-7 [file inline-supplementary-material-7.pdf]

# **Supplementary File 7: Multivariable logistic regression of treatment regimen as a predictor of negative outcomes- isoniazid resistance genotype included**

Multivariable logistic regression of treatment regimen as a predictor of negative regimen-specific outcomes in patients without additional drug resistance, unless to streptomycin, taking into account Hr resistance genotype. Model contains 115 patients and adjusted for all variables in the table, in addition to sex, age, ethnic group and previous TB treatment. \*strata perfectly predicts the outcome, CI- confidence interval, E- ethambutol, Fq- fluoroquinolones, H- isoniazid, m- months, M- moxifloxacin, OR- odds ratio, p- p-value, R- rifamycin, TB- tuberculosis, Z- pyrazinamide

| Exposure variables   |                                             | OR [95% CI], p-value |
|----------------------|---------------------------------------------|----------------------|
| Regimen              | [H]RfZE                                     | p=0.42               |
|                      | [H]RfZE-Fq/M                                | 0.57 [0.14-2.28]     |
| Thrice weekly dosing | More frequent                               | p=0.26               |
|                      | Thrice weekly                               | 3.15 [0.43-23.11]    |
| Phenotype            | Highly resistant                            | p=0.78               |
|                      | Resistant                                   | 1.99 [0.10-37.81]    |
|                      | Borderline, sensitive or results not logged | 2.56 [0.14-47.85]    |
| Genotype             | <i>fabG1</i> C-15T                          | p=0.31               |
|                      | <i>katG</i> S315T/N                         | 2.06 [0.48-8.83]     |
|                      | Multiple/other                              | *                    |
