# Supplementary material
Source: HighWire-hosted journal article supplement (https://erj.ersjournals.com/content/54/4/1900982)
Supplement: inline-supplementary-material-8 [file inline-supplementary-material-8.pdf]

## Supplementary File 8

In order to assess the impact of any documented treatment non-adherence on the regimen-outcomes relationship, thrice weekly treatment was swapped for an adherence variable within the multivariable model. Evidence for effect modification between regimen and adherence was not detected. The inclusion of this variable did not have an appreciable impact on the effect estimate for treatment regimen (0.90 [0.50-1.63], 0.73; Supplementary File 8 Table 1). When individuals with any drug resistance pattern were included in the model the effect estimate also remained largely unaltered (0.98 [0.55-1.76], 0.94; Supplementary File 8 Table 2).

After finding a potential association between drug resistance and site of disease with the use of Fqs (Supplementary File 4 Table 2), *post hoc* these variables were also included the main multivariable model. No discernible difference in the odds of a negative outcome between the two regimens was detected (0.96 [0.51-1.83], 0.91).

**Table 1: Sensitivity analysis- multivariable logistic regression of treatment regimen as a predictor of negative outcomes (adherence included)**

Multivariable logistic regression of treatment regimen as a predictor of negative regimen-specific outcomes in patients without additional drug resistance, unless to streptomycin, adjusted for all variables in the table. Sensitivity analysis adjusting for adherence to treatment instead of thrice weekly dosing. Model contains 453 patients. CI- confidence interval, E- ethambutol, Fq- fluoroquinolones, H- isoniazid, m- months, M- moxifloxacin, OR- odds ratio, p- p-value, Rf- rifamycin, TB- tuberculosis, Z- pyrazinamide

| Exposure variables                 |                                             | OR [95% CI], p-value |
|------------------------------------|---------------------------------------------|----------------------|
| Regimen                            | [H]RfZE                                     | p=0.73               |
|                                    | [H]RfZE-Fq/M                                | 0.90 [0.50-1.63]     |
| Adherence issues or treatment gaps | No or unknown                               | p=0.22               |
|                                    | Not severe or of unknown severity           | 2.02 [0.90-4.52]     |
|                                    | Severe                                      | 0.82 [0.31-2.17]     |
| Phenotype                          | Highly resistant                            | p=0.32               |
|                                    | Resistant                                   | 0.62 [0.17-2.28]     |
|                                    | Borderline, sensitive or results not logged | 2.01 [0.71-5.68]     |
|                                    | Missing                                     |                      |
| Sex                                | Male                                        | p=0.14               |
|                                    | Female                                      | 1.52 [0.87-2.65]     |
| Age (years)                        | 18-37                                       |                      |
|                                    | Per 20 year increase                        | 1.08 [0.71-1.66]     |
| Ethnic group                       | White                                       | 0.38 [0.14-1.00]     |
|                                    | Black African                               | 0.34 [0.09-1.36]     |
|                                    | Black Other                                 | 0.52 [0.23-1.19]     |
|                                    | Indian subcontinent                         | 1.02 [0.42-2.48]     |
|                                    | Other                                       |                      |
| Previous TB diagnosis              | No                                          | 2.70 [0.67-10.78]    |
|                                    | Yes                                         | p=0.73               |

**Table 2: Sensitivity analysis- multivariable logistic regression of treatment regimen as a predictor of negative outcomes (all patterns of drug resistance included)**

Multivariable logistic regression of treatment regimen as a predictor of negative regimen-specific outcomes, adjusted for all variables in the table (including the presence of additional drug resistance). Sensitivity analysis including all individuals, regardless of drug resistance status. Model contains 459 patients. CI- confidence interval, E- ethambutol, Fq- fluoroquinolones, H- isoniazid, m- months, M- moxifloxacin, OR- odds ratio, p- p-value, Rf- rifamycin, TB- tuberculosis, Z- pyrazinamide

| Exposure variables             |                                             | OR [95% CI], p-value |
|--------------------------------|---------------------------------------------|----------------------|
| Regimen                        | [H]RfZE                                     | p=0.94               |
|                                | [H]RfZE-Fq/M                                | 0.98 [0.55-1.76]     |
| Thrice weekly dosing           | More frequent                               | p=0.01               |
|                                | Thrice weekly                               | 3.09 [1.31-7.33]     |
| Phenotype                      | Highly resistant                            | p=0.68               |
|                                | Resistant                                   | 0.62 [0.19-2.02]     |
|                                | Borderline, sensitive or results not logged | 1.17 [0.39-3.49]     |
| Sex                            | Male                                        | p=0.00               |
|                                | Female                                      | 2.25 [1.28-3.95]     |
| Age (years)                    | 18-37                                       | p=0.71               |
|                                | Per 20 year increase                        | 1.09 [0.70-1.69]     |
| Ethnic group                   | White                                       | p=0.08               |
|                                | Black African                               | 0.36 [0.13-0.97]     |
|                                | Black Other                                 | 0.32 [0.09-1.17]     |
|                                | Indian subcontinent                         | 0.57 [0.24-1.35]     |
|                                | Other                                       | 0.99 [0.39-2.52]     |
| Previous TB diagnosis          | No                                          | p=0.03               |
|                                | Yes                                         | 4.54 [1.22-16.83]    |
| Any additional drug resistance | Absent                                      | p=0.59               |
|                                | Present                                     | 1.19 [0.64-2.21]     |
