# Supplementary material
Source: HighWire-hosted journal article supplement (https://erj.ersjournals.com/content/54/4/1900982)
Supplement: inline-supplementary-material-9 [file inline-supplementary-material-9.pdf]

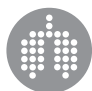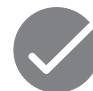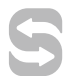

SHAREABLE PDF

# Fluoroquinolones and isoniazid-resistant tuberculosis: implications for the 2018 WHO guidance

Helen R. Stagg<sup>1,2</sup>, Graham H. Bothamley<sup>3,21</sup>, Jennifer A. Davidson<sup>4,21</sup>, Heinke Kunst<sup>5,21</sup>, Maeve K. Lalor<sup>1,4,21</sup>, Marc C. Lipman<sup>6,7,21</sup>, Miranda G. Loutet<sup>4,21</sup>, Stefan Lozewicz<sup>8,21</sup>, Tehreem Mohiyuddin<sup>4,21</sup>, Aula Abbara<sup>9,22</sup>, Eliza Alexander<sup>10,22</sup>, Helen Booth<sup>11,22</sup>, Dean D. Creer<sup>12,22</sup>, Ross J. Harris<sup>13,22</sup>, Onn Min Kon<sup>14,22</sup>, Michael R. Loebinger<sup>15,22</sup>, Timothy D. McHugh<sup>16,22</sup>, Heather J. Milburn<sup>17,22</sup>, Paramita Palchaudhuri<sup>18,22</sup>, Patrick P.J. Phillips<sup>19,22</sup>, Erik Schmok<sup>3,22</sup>, Lucy Taylor<sup>10,22</sup> and Ibrahim Abubakar<sup>1</sup>, on behalf of the London INH-R TB study group<sup>20</sup>

**Affiliations:** <sup>1</sup>Institute for Global Health, University College London, London, UK. <sup>2</sup>Usher Institute of Population Health Sciences and Informatics, University of Edinburgh, Edinburgh, UK. <sup>3</sup>Respiratory Medicine, Homerton University Hospital, London, UK. <sup>4</sup>Tuberculosis Unit, National Infection Service, Public Health England, London, UK. <sup>5</sup>Blizard Institute, Barts and The London School of Medicine and Dentistry, Queen Mary University of London, London, UK. <sup>6</sup>Respiratory Medicine, Royal Free Hospital, London, UK. <sup>7</sup>UCL Respiratory, Division of Medicine, University College London. <sup>8</sup>Respiratory Medicine, North Middlesex University Hospital, London, UK. <sup>9</sup>Infectious Diseases, London North West University Healthcare NHS Trust, London, UK. <sup>10</sup>National Mycobacterial Reference Service South, Public Health England, London, UK. <sup>11</sup>Tuberculosis Service, University College London Hospitals/Whittington Health, London, UK. <sup>12</sup>Respiratory Medicine, Barnet General Hospital, Royal Free London NHS Foundation Trust, London, UK. <sup>13</sup>Statistics, Modelling and Economics Department, Public Health England, London, UK. <sup>14</sup>TB Service, Imperial College Healthcare, London, UK. <sup>15</sup>Respiratory Medicine, Chelsea and Westminster Hospital, London, UK. <sup>16</sup>Centre for Clinical Microbiology, University College London, London, UK. <sup>17</sup>Respiratory Medicine, Guy's and St Thomas' Hospital, London, UK. <sup>18</sup>Respiratory Services, Queen Elizabeth Hospital, London, UK. <sup>19</sup>Dept of Medicine and Dept of Epidemiology and Biostatistics, University of California San Francisco, San Francisco, CA, USA. <sup>20</sup>Additional London INH-R TB study group members are listed in the acknowledgements section. <sup>21</sup>These authors contributed equally to this manuscript and are presented alphabetically. <sup>22</sup>These authors contributed equally to this manuscript and are presented alphabetically.

**Correspondence:** Helen R. Stagg, Usher Institute of Population Health Sciences and Informatics, University of Edinburgh, Edinburgh, EH8 9DX, UK. E-mail: helen.stagg@ed.ac.uk

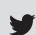

@ERSpublications

**WHO has assessed regimen recommendations for isoniazid-resistant TB to be of very low certainty. The addition of fluoroquinolones to a 12-month (isoniazid, rifamycin, ethambutol, short-duration pyrazinamide) regimen may be unnecessary in certain settings.** <http://bit.ly/2XoTgNL>

**Cite this article as:** Stagg HR, Bothamley GH, Davidson JA, *et al.* Fluoroquinolones and isoniazid-resistant tuberculosis: implications for the 2018 WHO guidance. *Eur Respir J* 2019; 54: 1900982 [<https://doi.org/10.1183/13993003.00982-2019>].

This single-page version can be shared freely online.

## ABSTRACT

**Introduction:** 2018 World Health Organization (WHO) guidelines for the treatment of isoniazid (H)-resistant (Hr) tuberculosis recommend a four-drug regimen: rifampicin (R), ethambutol (E), pyrazinamide (Z) and levofloxacin (Lfx), with or without H ([H]RZE-Lfx). This is used once Hr is known, such that patients complete 6 months of Lfx ( $\geq 6$ [H]RZE-6Lfx). This cohort study assessed the impact of

fluoroquinolones (Fq) on treatment effectiveness, accounting for Hr mutations and degree of phenotypic resistance.

**Methods:** This was a retrospective cohort study of 626 Hr tuberculosis patients notified in London, 2009–2013. Regimens were described and logistic regression undertaken of the association between regimen and negative regimen-specific outcomes (broadly, death due to tuberculosis, treatment failure or disease recurrence).

**Results:** Of 594 individuals with regimen information, 330 (55.6%) were treated with (H)RfZE (Rf=rifamycins) and 211 (35.5%) with (H)RfZE-Fq. The median overall treatment period was 11.9 months and median Z duration 2.1 months. In a univariable logistic regression model comparing (H)RfZE with and without Fqs, there was no difference in the odds of a negative regimen-specific outcome (baseline (H) RfZE, cluster-specific odds ratio 1.05 (95% CI 0.60–1.82),  $p=0.87$ ; cluster NHS trust). Results varied minimally in a multivariable model. This odds ratio dropped (0.57, 95% CI 0.14–2.28) when Hr genotype was included, but this analysis lacked power ( $p=0.42$ ).

**Conclusions:** In a high-income setting, we found a 12-month (H)RfZE regimen with a short Z duration to be similarly effective for Hr tuberculosis with or without a Fq. This regimen may result in fewer adverse events than the WHO recommendations.
